# Supplementary material for: Balancing Efficiency and Engagement: AI-Assisted Content for Research Communications in the RECOVER Initiative
Source: Research Square preprint supplement (doi:10.21203/rs.3.rs-7660686/v1), 2025-09-26
Supplement: Supplementary file 1 [file 6832d826d5fc1310725f1baf.docx]

**Supplementary Table 1:** Research topics & subtopics that continue to see increased engagement

| **Topic** | **Subtopic** | **# of webpages with increased engagement dedicated to this topic** | **Total** |
| --- | --- | --- | --- |
| **Cardiopulmonary issues** |  |  | **18** |
|  | Cardiovascular/pulmonary problems | 4 |  |
|  | Shortness of breath | 3 |  |
|  | Palpitations | 3 |  |
|  | racing heart | 3 |  |
|  | arrhythmias | 3 |  |
|  | Faintness and dizziness | 1 |  |
|  | Pulmonary PASC | 1 |  |
|  |  |  |  |
| **Miscellaneous** |  |  | **7** |
|  | Musculoskeletal problems | 2 |  |
|  | Post exertional malaise | 1 |  |
|  | Dermatologic/skin problems | 1 |  |
|  | Hair loss | 1 |  |
|  | Diabetes | 1 |  |
|  | AKI | 1 |  |
|  |  |  |  |
| **ENT** |  |  | **3** |
|  | Ear, nose, throat problems | 1 |  |
|  | Hearing problems (loss, tinnitus, etc.) | 1 |  |
|  | Smell Loss | 1 |  |
|  |  |  |  |
| **Gastrointestinal issues** |  |  | **5** |
|  | Gastrointestinal Issues (vomiting, diarrhea, constipation, etc.) | 3 |  |
|  | Gastrointestinal/Digestive problems | 2 |  |
|  |  |  |  |
| **Neuropsychiatric issues** |  |  | **17** |
|  | Cognitive problems | 3 |  |
|  | Anxiety/Depression/PTSD | 2 |  |
|  | Brain Fog (difficulty thinking/concentrating) | 1 |  |
|  | Weakness in arms or legs | 1 |  |
|  | Nerve problems (tremors, seizures, numbness, burning, etc.) | 1 |  |
|  | Neuropsychological problems | 1 |  |
|  | Pain (in any part of the body) | 1 |  |
|  | Movement problems | 1 |  |
|  | Brain | 5 |  |
|  | ME/CFS | 1 |  |
|  |  |  |  |
| **Genitourinary** | Urinary problems | 1 | **1** |
|  |  |  |  |
| **Infectious Disease isssues** |  |  | **9** |
|  | Immunology | 5 |  |
|  | MIS-C | 1 |  |
|  | Viral Persistence | 1 |  |
|  | Vaccines | 1 |  |
|  | Paxlovid | 1 |  |
|  |  |  |  |
| **OB/GYN** |  |  | **2** |
|  | Gynecological problems | 1 |  |
|  | Infection after Pregnancy | 1 |  |
|  |  |  |  |
| **Sleep/Fatigue issues** |  |  | **7** |
|  | Sleep problems | 2 |  |
|  | Post-exertional malaise | 2 |  |
|  | Fatigue | 2 |  |
|  | Sleep Issues (insomnia, sleep apnea, etc.) | 1 |  |
|  |  |  |  |
| **PASC Characteristics*** |  |  | **11** |
|  | Ethnicity | 1 |  |
|  | Age | 3 |  |
|  | Epidemiology | 1 |  |
|  | SDoH | 1 |  |
|  | Incidence | 1 |  |
|  | PASC Features | 1 |  |
|  | Covid subtypes | 1 |  |
|  | Risk Factors | 1 |  |
|  | Clinical Features | 1 |  |
|  |  |  |  |
| **Investigating Technique** |  |  | **8** |
|  | Symptom clustering | 3 |  |
|  | Study Protocol | 4 |  |
|  | PASC Definition | 1 |  |
|  |  |  |  |
| **Lab Values** |  |  | **4** |
|  | Elevated platelet count | 1 |  |
|  | Elevated glucose | 1 |  |
|  | Elevated cholesterol | 1 |  |
|  | Vital Measurements | 1 |  |

*PASC = Post-Acute Sequelae of SARS-CoV-2 infection
